# Supplementary material
Source: publisher figshare collection journal article supplement (https://karger.figshare.com/ndownloader/files/21962832)
Supplement: Supplementary file 1 [file 21962832]

Supplementary Table. Summary of deaths from other diseases

| Period | Age at death (years) | Complication | Cause of death |
| --- | --- | --- | --- |
| Patients with complications (n=9) | | | |
| 5 M |  | Pneumonia, RN palsy, bleeding | Pneumonia |
| 7 M |  | Interstitial pneumonia, ARDS | Suicide |
| 9 M |  | Refractory pleural effusion | Malnutrition |
| 18 M |  | Pneumonia | Hemoptysis |
| 21 M |  | Pneumonia, RN palsy | Heart failure |
| 36 M |  | Pneumonia, gastric conduit necrosis | Pneumonia |
| 38 M |  | Chylothorax | Pneumonia |
| 40 M |  | DIC, acute renal failure | Pneumonia |
| 65 M |  | Anastomotic leakage | Lung cancer |
| Patients without complications (n=4) | | | |
| 1 M |  | - | Gastrointestinal bleeding |
| 17 M |  | - | Pneumonia |
| 36 M |  | - | Lung cancer |
| 72 M |  | - | Lung cancer |

RN: recurrent laryngeal nerve, ARDS: acute respiratory distress syndrome, DIC: disseminated intravascular coagulation.
